# Supplementary material for: Pollution Characteristics and Health Risk Assessment of Heavy Metals in Agricultural Soils over the Past Five Years in Zhejiang, Southeast China
Source: MDPI journal article supplement (doi:10.3390/ijerph192214642), 2022-11-08
Supplement: s1 [file s1]

## Supplemental Materials

# Pollution Characteristics and Health Risk Assessment of Heavy Metals in Agricultural Soils over the Past Five Years in Zhejiang, Southeast China

Jie Xiang <sup>1,†</sup>, Peiwei Xu <sup>1,†</sup>, Weizhong Chen <sup>1</sup>, Xiaofeng Wang <sup>1</sup>, Zhijian Chen <sup>1</sup>, Dandan Xu <sup>1</sup>,  
Yuan Chen <sup>1</sup>, Mingluan Xing <sup>1</sup>, Ping Cheng <sup>1</sup>, Lizhi Wu <sup>1,\*</sup> and Bing Zhu <sup>2,\*</sup>

<sup>1</sup> Department of Environmental Health, Zhejiang Provincial Center for Disease Control and Prevention, Hangzhou 310000, China

<sup>2</sup> Hangzhou Center for Disease Control and Prevention, Hangzhou 310000, China

\* Correspondence: lzhwu@cdc.zj.cn (L.W.); 96zhubing@163.com (B.Z.);  
Tel.: +86-0571-87115221 (L.W.); +86-13588012016 (B.Z.)

† These authors contributed equally to this work.

Table S1. Parameters used for the health risk assessment in this study.

| Parameters        | Description                               | Units                  | Value                                                    | References |
|-------------------|-------------------------------------------|------------------------|----------------------------------------------------------|------------|
| IR <sub>ing</sub> | ingestion rate of soil                    | mg/day                 | 100 for adults<br>200 for children                       | [1,2]      |
| IR <sub>inh</sub> | inhalation rate of soil                   | m <sup>3</sup> /day    | 15.7 for adults<br>10.1 for children                     | [3,4]      |
| ED                | exposure duration                         | year                   | 24 for adults<br>6 for children                          | [1,2]      |
| EF                | exposure frequency                        | days/year              | 350                                                      | [1,2]      |
| FI                | factor ingested from contamination source | unitless               | 1                                                        |            |
| BW                | body weight of an exposed individual      | kg                     | 60.6 for adults<br>26.5 for children                     | [3,4]      |
| AT                | average exposure time                     | days                   | ED × 365 for non-carcinogens<br>70 × 365 for carcinogens | [1,2]      |
| SA                | exposed skin surface area                 | cm <sup>2</sup>        | 16000 for adults<br>9900 for children                    | [3,4]      |
| AF                | adherence factor                          | mg/cm <sup>2</sup> day | 0.07 for adults<br>0.2 for children                      | [5,6]      |
| ABS               | dermal absorption factor                  | unitless               | 0.001                                                    | [1]        |
| PEF               | emission factor                           | m <sup>3</sup> /kg     | 1.36 × 10 <sup>9</sup>                                   | [7]        |

Table S2. Reference dose (*RfD*) and slope factor (*SF*) of heavy metals for health risk assessment.

|    | <i>RfD</i> for<br>ingestion | <i>RfD</i> for<br>dermal<br>absorption | <i>RfD</i> for<br>inhalation | <i>SF</i> for<br>ingestion | <i>SF</i> for<br>dermal<br>absorption | <i>SF</i> for<br>inhalation | Reference |
|----|-----------------------------|----------------------------------------|------------------------------|----------------------------|---------------------------------------|-----------------------------|-----------|
| Pb | 0.0035                      | 0.000525                               | 0.00352                      | 0.0085                     | -                                     | -                           | [8,9]     |
| Cd | 0.001                       | 0.00001                                | 0.00001                      | 6.1                        | 6.1                                   | 6.3                         | [8,9]     |
| Cr | 0.003                       | 0.00006                                | 0.0000286                    | 0.5                        | 20                                    | 42                          | [8–10]    |

Table S3 The concentration of heavy metals in agricultural soils of different cities from 2016 to 2020 (mg·kg<sup>-1</sup>).

| Year | Metal | N   | Zhejiang<br>province     | City                |                     |                     |                      |                     |                      |                      |                     |                     |                      |                     |
|------|-------|-----|--------------------------|---------------------|---------------------|---------------------|----------------------|---------------------|----------------------|----------------------|---------------------|---------------------|----------------------|---------------------|
|      |       |     |                          | HaZ                 | NB                  | WZ                  | JX                   | HuZ                 | SX                   | JH                   | QZ                  | ZS                  | TZ                   | LS                  |
| 2016 | Pb    | 381 | 29.3<br>(20.3,39.2)      | 39.3 ± 12.5         | 34.9 ± 8.6          | 4.5<br>(3.6,4.8)    | 29.2<br>(24.2, 32.9) | 50.8 ± 17.5         | 32.2<br>(27.2, 36.6) | 33.6 ± 17.4          | 20.5 ± 8.6          | 41.2<br>(29.5,52.7) | 28.3 ± 10.1          | 21.5<br>(14.8,38.8) |
|      | Cd    | 381 | 0.18<br>(0.11,0.28)      | 0.16<br>(0.09,0.34) | 0.18<br>(0.15,0.21) | 0.30<br>(0.22,0.34) | 0.09<br>(0.06,0.19)  | 0.10 ± 0.10         | 0.23<br>(0.14,0.34)  | 0.18<br>(0.10,0.40)  | 0.16<br>(0.12,0.22) | 0.18<br>(0.14,0.23) | 0.16±0.06            | 0.29<br>(0.15,0.50) |
|      | Cr    | 381 | 41.3<br>(23.8,61.1)      | 40.6 ± 18.7         | 37.2<br>(26.3,42.7) | 29.4 ± 9.3          | 56.9 ± 10.4          | 2.5<br>(2.5,7.0)    | 34.8 ± 19.6          | 63.2<br>(39.4,90.4)  | 44.6<br>(27.4,58.9) | 67.6 ± 6.2          | 76.0 ± 26.6          | 4.1<br>(2.1,7.6)    |
| 2017 | Pb    | 372 | 32.6±15.1<br>(34.0,40.4) | 37.9<br>(34.0,40.4) | 39.6 ± 12.8         | 31.4<br>(5.6,45.7)  | 21.6<br>(17.4,28.2)  | 30.8 ± 6.8          | 31.1<br>(26.0,39.8)  | 36.7 ± 12.5          | 18.9 ± 8.7          | 34.4 ± 12.6         | 40.3 ± 10.3          | 34.4 ± 18.4         |
|      | Cd    | 372 | 0.17<br>(0.09,0.30)      | 0.35<br>(0.25,0.61) | 0.15<br>(0.10,0.22) | 0.22<br>(0.21,0.26) | 0.06<br>(0.03,0.11)  | 0.17<br>(0.09,0.41) | 0.17<br>(0.11,0.47)  | 0.12<br>(0.08,0.24)  | 0.14<br>(0.10,0.18) | 0.09±0.06           | 0.19<br>(0.14,0.32)  | 0.17<br>(0.08,0.37) |
|      | Cr    | 372 | 45.0<br>(25.0,67.7)      | 52.0 ± 21.0         | 60.1 ± 27.6         | 41.3<br>(24.3,54.7) | 68.1<br>(37.1,96.8)  | 56.0<br>(47.0,58.0) | 34.2<br>(17.8,42.3)  | 51.1<br>(22.8,89.7)  | 37.9<br>(21.4,64.2) | 58.3 ± 24.2         | 63.6<br>(36.2,146.7) | 6.9<br>(4.0,14.9)   |
| 2018 | Pb    | 388 | 29.4<br>(20.7,43.3)      | 29.3<br>(25.5,33.5) | 31.1<br>(26.8,40.3) | 40.0 ± 12.1         | 19.1 ± 5.7           | 27.9<br>(24.5,34.9) | 32.5<br>(23.0,56.7)  | 66.0<br>(31.6,83.8)  | 13.4<br>(11.3,33.0) | 28.3 ± 17.3         | 39.4 ± 9.9           | 23.8<br>(16.2,43.4) |
|      | Cd    | 388 | 0.20<br>(0.12,0.31)      | 0.47 ± 0.28         | 0.16<br>(0.12,0.20) | 0.27<br>(0.19,0.37) | 0.13<br>(0.09,0.31)  | 0.28<br>(0.15,0.42) | 0.22 ± 0.14          | 0.14<br>(0.08,0.33)  | 0.12 ± 0.10         | 0.21<br>(0.18,0.24) | 0.24 ± 0.09          | 0.17<br>(0.12,0.26) |
|      | Cr    | 388 | 39.2<br>(18.4,63.5)      | 48.1<br>(22.3,64.3) | 63.5±25.1           | 22.5<br>(11.5,47.3) | 37.1<br>(22.2,63.9)  | 24.6 ± 9.7          | 45.1<br>(12.1,60.7)  | 41.8<br>(38.5,52.5)  | 26.1 ± 17.8         | 42.4 ± 35.5         | 107.6 ± 34.0         | 13.5<br>(7.2,24.9)  |
| 2019 | Pb    | 383 | 35.6<br>(27.2,47.6)      | 36.0<br>(29.7,42.8) | 29.1<br>(24.1,39.7) | 46.7<br>(41.6,55.0) | 26.8 ± 7.0           | 24.0 ± 4.4          | 56.9<br>(38.6,66.1)  | 35.8<br>(30.6, 46.3) | 39.8<br>(36.1,52.4) | 76.3 ± 24.3         | 22.3<br>(17.2,29.8)  | 37.0 ± 12.7         |
|      | Cd    | 383 | 0.17<br>(0.11,0.23)      | 0.38 ± 0.19         | 0.20<br>(0.17,0.24) | 0.20 ± 0.09         | 0.14<br>(0.10,0.19)  | 0.19 ± 0.04         | 0.17 ± 0.09          | 0.15<br>(0.10,0.20)  | 0.21<br>(0.15,0.31) | 0.01<br>(0.01,0.09) | 0.15 ± 0.07          | 0.11<br>(0.05,0.13) |

|      |    |     |                      |                     |                     |                     |                     |                     |                     |                     |                     |                     |                     |                     |
|------|----|-----|----------------------|---------------------|---------------------|---------------------|---------------------|---------------------|---------------------|---------------------|---------------------|---------------------|---------------------|---------------------|
| 2020 | Cr | 383 | 46.0<br>(29.1,61.1)  | 40.0<br>(31.4,46.0) | 68.8 ± 11.8         | 32.4<br>(2.5,63.2)  | 37.2<br>(32.5,51.0) | 53.0 ± 14.6         | 52.4<br>(47.0,59.2) | 31.3<br>(23.0,47.1) | 31.5 ± 14.0         | 50.9 ± 13.1         | 45.6<br>(6.3,110.0) | 51.0<br>(41.8,58.8) |
|      | Pb | 386 | 35.2<br>(22.5,48.6)  | 27.2<br>(21.0,45.3) | 22.2<br>(17.8,37.7) | 39.2<br>(25.7,52.0) | 23.2<br>(21.5,26.9) | 24.1<br>(18.8,29.6) | 51.9<br>(27.9,65.5) | 48.0<br>(16.0,54.3) | 36.2<br>(18.0,48.8) | 45.3<br>(40.9,54.0) | 36.5<br>(30.4,44.6) | 42.5 ± 10.9         |
|      | Cd | 386 | 0.18<br>(0.12,0.26)  | 0.23<br>(0.13,0.51) | 0.18<br>(0.12,0.23) | 0.23 ± 0.10         | 0.16<br>(0.13,0.20) | 0.19 ± 0.12         | 0.17<br>(0.12,0.22) | 0.25<br>(0.06,0.60) | 0.20<br>(0.11,0.34) | 0.17 ± 0.05         | 0.16<br>(0.07,0.27) | 0.15<br>(0.05,0.21) |
|      | Cr | 386 | 42.0<br>(20.6, 66.4) | 45.7 ± 22.1         | 68.5<br>(29.0,82.5) | 19.0<br>(9.2,48.6)  | 72.8 ± 16.3         | 48.0 ± 13.0         | 47.4 ± 18.8         | 9.5 (3.4,49.9)      | 51.0 ± 20.3         | 30.0<br>(25.3,42.8) | 35.0<br>(15.0,83.0) | 15.6<br>(9.7,28.7)  |

Table S4. Detailed sampling locations in this study

| Number | Longitude | Latitude |
|--------|-----------|----------|--------|-----------|----------|--------|-----------|----------|--------|-----------|----------|
| 1      | 119.58    | 29.83    | 501    | 120.56    | 27.59    | 1001   | 120.75    | 29.53    | 1501   | 122.41    | 29.93    |
| 2      | 119.61    | 29.81    | 502    | 120.55    | 27.61    | 1002   | 120.70    | 29.51    | 1502   | 122.41    | 29.91    |
| 3      | 119.58    | 29.82    | 503    | 120.54    | 27.62    | 1003   | 120.68    | 29.49    | 1503   | 122.40    | 29.92    |
| 4      | 119.61    | 29.80    | 504    | 120.57    | 27.61    | 1004   | 120.75    | 29.54    | 1504   | 122.40    | 29.91    |
| 5      | 119.61    | 29.70    | 505    | 120.41    | 27.58    | 1005   | 120.71    | 29.58    | 1505   | 122.29    | 30.03    |
| 6      | 119.61    | 29.69    | 506    | 120.41    | 27.57    | 1006   | 120.72    | 29.65    | 1506   | 122.30    | 30.03    |
| 7      | 119.64    | 29.72    | 507    | 120.40    | 27.57    | 1007   | 120.77    | 29.64    | 1507   | 122.29    | 30.03    |
| 8      | 119.71    | 29.66    | 508    | 120.45    | 27.59    | 1008   | 120.65    | 29.60    | 1508   | 122.27    | 30.05    |
| 9      | 119.83    | 29.76    | 509    | 120.56    | 27.72    | 1009   | 120.77    | 29.54    | 1509   | 122.10    | 29.74    |
| 10     | 119.81    | 29.74    | 510    | 120.56    | 27.71    | 1010   | 120.80    | 29.60    | 1510   | 122.14    | 29.76    |
| 11     | 119.76    | 29.80    | 511    | 120.58    | 27.71    | 1011   | 120.78    | 29.59    | 1511   | 122.14    | 29.70    |
| 12     | 119.78    | 29.80    | 512    | 120.59    | 27.70    | 1012   | 120.80    | 29.54    | 1512   | 122.11    | 29.78    |
| 13     | 119.54    | 29.90    | 513    | 120.38    | 27.41    | 1013   | 120.86    | 29.62    | 1513   | 122.27    | 29.84    |
| 14     | 119.54    | 29.90    | 514    | 120.65    | 27.69    | 1014   | 120.86    | 29.64    | 1514   | 122.30    | 29.82    |
| 15     | 119.45    | 29.84    | 515    | 120.64    | 27.70    | 1015   | 120.88    | 29.64    | 1515   | 122.29    | 29.84    |
| 16     | 119.54    | 29.90    | 516    | 120.63    | 27.70    | 1016   | 120.89    | 29.61    | 1516   | 122.26    | 29.83    |
| 17     | 119.46    | 29.94    | 517    | 120.31    | 27.65    | 1017   | 120.70    | 29.45    | 1517   | 122.24    | 29.76    |
| 18     | 119.46    | 29.94    | 518    | 120.30    | 27.62    | 1018   | 120.72    | 29.45    | 1518   | 122.23    | 29.78    |
| 19     | 119.44    | 29.95    | 519    | 120.38    | 27.66    | 1019   | 120.69    | 29.44    | 1519   | 122.26    | 29.78    |
| 20     | 119.40    | 29.91    | 520    | 120.32    | 27.62    | 1020   | 120.68    | 29.43    | 1520   | 122.25    | 29.76    |
| 21     | 119.16    | 29.85    | 521    | 120.78    | 30.39    | 1021   | 119.79    | 28.95    | 1521   | 121.49    | 28.62    |
| 22     | 119.07    | 29.86    | 522    | 120.81    | 30.36    | 1022   | 119.77    | 28.98    | 1522   | 121.50    | 28.64    |
| 23     | 119.13    | 29.89    | 523    | 120.79    | 30.36    | 1023   | 119.76    | 28.92    | 1523   | 121.46    | 28.62    |
| 24     | 119.15    | 29.81    | 524    | 120.78    | 30.36    | 1024   | 119.76    | 28.94    | 1524   | 121.46    | 28.62    |
| 25     | 118.76    | 29.41    | 525    | 120.76    | 30.46    | 1025   | 119.70    | 28.73    | 1525   | 121.41    | 28.60    |
| 26     | 118.80    | 29.37    | 526    | 120.77    | 30.45    | 1026   | 119.85    | 28.75    | 1526   | 121.41    | 28.60    |
| 27     | 118.80    | 29.32    | 527    | 120.79    | 30.41    | 1027   | 119.78    | 28.74    | 1527   | 121.41    | 28.61    |
| 28     | 118.77    | 29.33    | 528    | 120.79    | 30.42    | 1028   | 119.76    | 28.66    | 1528   | 121.41    | 28.63    |
| 29     | 118.79    | 29.41    | 529    | 120.64    | 30.53    | 1029   | 119.60    | 28.82    | 1529   | 121.39    | 28.73    |
| 30     | 118.78    | 29.33    | 530    | 120.67    | 30.75    | 1030   | 119.66    | 28.89    | 1530   | 121.40    | 28.73    |
| 31     | 118.77    | 29.82    | 531    | 120.70    | 30.55    | 1031   | 119.65    | 28.83    | 1531   | 121.41    | 28.72    |
| 32     | 118.82    | 29.81    | 532    | 120.71    | 30.53    | 1032   | 119.65    | 28.82    | 1532   | 121.42    | 28.72    |
| 33     | 118.66    | 29.51    | 533    | 120.57    | 30.45    | 1033   | 119.61    | 28.57    | 1533   | 121.44    | 28.71    |
| 34     | 118.71    | 29.51    | 534    | 120.59    | 30.46    | 1034   | 119.64    | 28.55    | 1534   | 121.46    | 28.71    |
| 35     | 118.73    | 29.51    | 535    | 120.58    | 30.45    | 1035   | 119.64    | 28.56    | 1535   | 121.49    | 28.73    |
| 36     | 118.53    | 29.56    | 536    | 120.56    | 30.44    | 1036   | 119.69    | 28.55    | 1536   | 121.49    | 28.72    |
| 37     | 118.56    | 29.44    | 537    | 120.58    | 30.51    | 1037   | 119.63    | 28.74    | 1537   | 121.37    | 28.65    |
| 38     | 118.55    | 29.43    | 538    | 120.57    | 30.51    | 1038   | 119.66    | 28.72    | 1538   | 121.40    | 28.63    |
| 39     | 118.58    | 29.47    | 539    | 120.55    | 30.48    | 1039   | 119.66    | 28.73    | 1539   | 121.41    | 28.65    |
| 40     | 118.51    | 29.40    | 540    | 120.56    | 30.49    | 1040   | 119.63    | 28.71    | 1540   | 121.40    | 28.66    |
| 41     | 121.95    | 29.56    | 541    | 120.52    | 30.58    | 1041   | 119.46    | 29.27    | 1541   | 120.46    | 28.71    |

---

|    |        |       |     |        |       |      |        |       |      |        |       |
|----|--------|-------|-----|--------|-------|------|--------|-------|------|--------|-------|
| 42 | 121.94 | 29.57 | 542 | 120.49 | 30.59 | 1042 | 119.45 | 29.28 | 1542 | 120.50 | 28.76 |
| 43 | 121.93 | 29.57 | 543 | 120.49 | 30.60 | 1043 | 119.46 | 29.28 | 1543 | 120.48 | 28.65 |
| 44 | 121.92 | 29.56 | 544 | 120.44 | 30.58 | 1044 | 119.44 | 29.31 | 1544 | 120.40 | 28.67 |
| 45 | 121.84 | 29.24 | 545 | 120.59 | 30.71 | 1045 | 119.41 | 29.18 | 1545 | 120.64 | 28.79 |
| 46 | 121.85 | 29.23 | 546 | 120.56 | 30.69 | 1046 | 119.40 | 29.18 | 1546 | 120.63 | 28.78 |
| 47 | 121.88 | 29.24 | 547 | 120.52 | 30.71 | 1047 | 119.37 | 29.17 | 1547 | 120.63 | 28.78 |
| 48 | 121.81 | 29.24 | 548 | 120.55 | 30.73 | 1048 | 119.38 | 29.21 | 1548 | 120.65 | 28.79 |
| 49 | 121.78 | 29.58 | 549 | 120.36 | 30.49 | 1049 | 119.48 | 29.13 | 1549 | 120.66 | 28.83 |
| 50 | 121.80 | 29.58 | 550 | 120.36 | 30.49 | 1050 | 119.50 | 29.15 | 1550 | 120.67 | 28.83 |
| 51 | 121.82 | 29.58 | 551 | 120.35 | 30.52 | 1051 | 119.50 | 29.16 | 1551 | 120.67 | 28.84 |
| 52 | 121.81 | 29.60 | 552 | 120.37 | 30.53 | 1052 | 119.47 | 29.16 | 1552 | 120.67 | 28.86 |
| 53 | 121.79 | 29.42 | 553 | 120.36 | 30.57 | 1053 | 119.48 | 29.25 | 1553 | 120.54 | 28.75 |
| 54 | 121.83 | 29.41 | 554 | 120.35 | 30.57 | 1054 | 119.47 | 29.23 | 1554 | 120.53 | 28.76 |
| 55 | 121.85 | 29.39 | 555 | 120.35 | 30.57 | 1055 | 119.49 | 29.22 | 1555 | 120.52 | 28.76 |
| 56 | 121.81 | 29.38 | 556 | 120.34 | 30.58 | 1056 | 119.49 | 29.23 | 1556 | 120.53 | 28.78 |
| 57 | 121.89 | 29.42 | 557 | 120.53 | 30.49 | 1057 | 119.35 | 29.36 | 1557 | 120.60 | 28.74 |
| 58 | 121.89 | 29.41 | 558 | 120.55 | 30.50 | 1058 | 119.41 | 29.34 | 1558 | 120.60 | 28.76 |
| 59 | 121.87 | 29.38 | 559 | 120.54 | 30.55 | 1059 | 119.41 | 29.32 | 1559 | 120.59 | 28.77 |
| 60 | 121.88 | 29.34 | 560 | 120.56 | 30.52 | 1060 | 119.41 | 29.31 | 1560 | 120.61 | 28.74 |
| 61 | 121.33 | 30.01 | 561 | 119.25 | 30.33 | 1061 | 118.22 | 29.23 | 1561 | 119.38 | 28.64 |
| 62 | 121.32 | 30.01 | 562 | 119.39 | 30.58 | 1062 | 118.22 | 29.23 | 1562 | 119.36 | 28.61 |
| 63 | 121.34 | 30.03 | 563 | 119.38 | 30.55 | 1063 | 118.23 | 29.19 | 1563 | 119.36 | 28.64 |
| 64 | 121.34 | 30.03 | 564 | 119.20 | 30.31 | 1064 | 118.25 | 29.18 | 1564 | 119.37 | 28.65 |
| 65 | 121.06 | 29.90 | 565 | 119.47 | 30.46 | 1065 | 118.52 | 29.14 | 1565 | 118.99 | 28.36 |
| 66 | 121.91 | 29.07 | 566 | 119.46 | 30.48 | 1066 | 118.50 | 29.14 | 1566 | 118.98 | 28.35 |
| 67 | 121.06 | 29.90 | 567 | 119.47 | 30.46 | 1067 | 118.47 | 29.11 | 1567 | 118.98 | 28.37 |
| 68 | 121.06 | 29.90 | 568 | 119.46 | 30.48 | 1068 | 118.45 | 29.10 | 1568 | 119.02 | 28.35 |
| 69 | 120.99 | 30.08 | 569 | 119.65 | 30.83 | 1069 | 118.44 | 29.05 | 1569 | 119.06 | 28.51 |
| 70 | 121.15 | 30.04 | 570 | 119.56 | 30.82 | 1070 | 118.35 | 29.01 | 1570 | 119.05 | 28.48 |
| 71 | 120.98 | 30.08 | 571 | 119.60 | 30.82 | 1071 | 118.35 | 29.03 | 1571 | 119.07 | 28.51 |
| 72 | 121.00 | 30.08 | 572 | 119.65 | 30.83 | 1072 | 118.37 | 29.06 | 1572 | 119.04 | 28.48 |
| 73 | 121.06 | 30.20 | 573 | 119.37 | 30.31 | 1073 | 118.40 | 29.33 | 1573 | 119.06 | 28.71 |
| 74 | 121.05 | 30.23 | 574 | 119.36 | 30.31 | 1074 | 118.39 | 29.30 | 1574 | 119.07 | 28.72 |
| 75 | 121.08 | 30.24 | 575 | 119.37 | 30.31 | 1075 | 118.38 | 29.27 | 1575 | 119.10 | 28.73 |
| 76 | 121.06 | 30.23 | 576 | 119.39 | 30.31 | 1076 | 118.37 | 29.26 | 1576 | 119.04 | 28.69 |
| 77 | 121.17 | 30.15 | 577 | 119.57 | 30.67 | 1077 | 118.36 | 29.21 | 1577 | 119.19 | 28.44 |
| 78 | 121.14 | 30.14 | 578 | 119.57 | 30.64 | 1078 | 118.36 | 29.19 | 1578 | 119.17 | 28.41 |
| 79 | 121.18 | 30.16 | 579 | 119.52 | 30.70 | 1079 | 118.38 | 29.18 | 1579 | 119.12 | 28.40 |
| 80 | 121.20 | 30.15 | 580 | 119.56 | 30.68 | 1080 | 118.41 | 29.23 | 1580 | 119.18 | 28.35 |
| 81 | 120.72 | 28.46 | 581 | 120.34 | 29.84 | 1081 | 118.71 | 28.79 | 1581 | 119.34 | 28.06 |
| 82 | 120.71 | 28.48 | 582 | 120.33 | 29.92 | 1082 | 118.69 | 28.79 | 1582 | 119.32 | 28.06 |
| 83 | 120.71 | 28.48 | 583 | 120.64 | 29.91 | 1083 | 118.74 | 28.77 | 1583 | 119.96 | 27.86 |
| 84 | 120.73 | 28.45 | 584 | 120.33 | 29.92 | 1084 | 118.70 | 28.78 | 1584 | 119.36 | 28.07 |

---

---

|     |        |       |     |        |       |      |        |       |      |        |       |
|-----|--------|-------|-----|--------|-------|------|--------|-------|------|--------|-------|
| 85  | 120.76 | 28.32 | 585 | 120.19 | 29.58 | 1085 | 118.45 | 28.62 | 1585 | 118.99 | 28.03 |
| 86  | 120.82 | 28.32 | 586 | 120.15 | 29.59 | 1086 | 118.47 | 28.63 | 1586 | 119.02 | 28.04 |
| 87  | 120.75 | 28.31 | 587 | 120.11 | 29.39 | 1087 | 118.45 | 28.63 | 1587 | 119.00 | 28.02 |
| 88  | 120.77 | 28.31 | 588 | 120.15 | 29.59 | 1088 | 118.47 | 28.63 | 1588 | 119.27 | 27.88 |
| 89  | 120.69 | 28.07 | 589 | 120.42 | 29.79 | 1089 | 118.50 | 28.55 | 1589 | 118.99 | 27.88 |
| 90  | 120.69 | 28.07 | 590 | 120.38 | 29.74 | 1090 | 118.81 | 28.87 | 1590 | 118.99 | 27.88 |
| 91  | 120.69 | 28.08 | 591 | 120.46 | 29.83 | 1091 | 118.50 | 28.57 | 1591 | 118.99 | 27.88 |
| 92  | 120.69 | 28.11 | 592 | 120.44 | 29.77 | 1092 | 118.46 | 28.56 | 1592 | 118.99 | 27.88 |
| 93  | 120.57 | 28.31 | 593 | 120.27 | 29.64 | 1093 | 118.46 | 28.70 | 1593 | 119.10 | 27.98 |
| 94  | 120.56 | 28.32 | 594 | 120.28 | 29.64 | 1094 | 118.46 | 28.69 | 1594 | 119.08 | 28.00 |
| 95  | 120.56 | 28.31 | 595 | 120.29 | 29.62 | 1095 | 118.49 | 28.65 | 1595 | 119.10 | 27.98 |
| 96  | 120.56 | 28.31 | 596 | 120.27 | 29.63 | 1096 | 118.46 | 28.66 | 1596 | 119.10 | 27.98 |
| 97  | 120.78 | 28.23 | 597 | 120.15 | 29.89 | 1097 | 118.88 | 28.89 | 1597 | 119.04 | 28.08 |
| 98  | 120.76 | 28.20 | 598 | 120.13 | 29.85 | 1098 | 118.69 | 28.84 | 1598 | 119.03 | 28.06 |
| 99  | 120.75 | 28.21 | 599 | 120.20 | 29.90 | 1099 | 118.69 | 28.90 | 1599 | 119.02 | 28.08 |
| 100 | 120.75 | 28.18 | 600 | 120.21 | 29.88 | 1100 | 118.68 | 28.85 | 1600 | 119.01 | 28.08 |
| 101 | 120.66 | 27.66 | 601 | 120.74 | 29.53 | 1101 | 121.89 | 30.05 | 1601 | 119.60 | 30.12 |
| 102 | 120.64 | 27.66 | 602 | 120.70 | 29.51 | 1102 | 121.89 | 30.02 | 1602 | 119.53 | 30.11 |
| 103 | 120.64 | 27.66 | 603 | 120.68 | 29.49 | 1103 | 121.86 | 30.04 | 1603 | 119.58 | 30.10 |
| 104 | 120.64 | 27.68 | 604 | 120.75 | 29.54 | 1104 | 121.87 | 30.01 | 1604 | 119.58 | 30.17 |
| 105 | 120.55 | 27.61 | 605 | 120.71 | 29.58 | 1105 | 122.14 | 30.08 | 1605 | 120.01 | 29.90 |
| 106 | 120.54 | 27.60 | 606 | 120.72 | 29.65 | 1106 | 122.18 | 30.07 | 1606 | 120.00 | 29.90 |
| 107 | 120.49 | 27.60 | 607 | 120.77 | 29.64 | 1107 | 122.17 | 30.07 | 1607 | 119.98 | 29.90 |
| 108 | 120.48 | 27.60 | 608 | 120.65 | 29.60 | 1108 | 122.17 | 30.09 | 1608 | 120.00 | 29.89 |
| 109 | 120.26 | 27.62 | 609 | 120.77 | 29.54 | 1109 | 122.12 | 30.09 | 1609 | 119.89 | 29.89 |
| 110 | 120.26 | 27.61 | 610 | 120.80 | 29.60 | 1110 | 122.16 | 30.11 | 1610 | 119.91 | 29.88 |
| 111 | 120.25 | 27.60 | 611 | 120.78 | 29.59 | 1111 | 122.13 | 30.11 | 1611 | 119.88 | 29.89 |
| 112 | 120.21 | 27.58 | 612 | 120.80 | 29.54 | 1112 | 122.14 | 30.12 | 1612 | 119.92 | 29.89 |
| 113 | 120.31 | 27.65 | 613 | 120.86 | 29.64 | 1113 | 122.05 | 30.05 | 1613 | 119.92 | 30.02 |
| 114 | 120.31 | 27.65 | 614 | 120.90 | 29.64 | 1114 | 122.03 | 30.05 | 1614 | 119.92 | 30.02 |
| 115 | 120.34 | 27.65 | 615 | 120.89 | 29.63 | 1115 | 122.02 | 30.05 | 1615 | 119.89 | 29.99 |
| 116 | 120.34 | 27.65 | 616 | 120.88 | 28.64 | 1116 | 122.03 | 30.06 | 1616 | 119.91 | 30.01 |
| 117 | 120.23 | 27.64 | 617 | 120.60 | 29.36 | 1117 | 122.08 | 30.13 | 1617 | 119.81 | 30.10 |
| 118 | 120.23 | 27.65 | 618 | 120.62 | 29.41 | 1118 | 122.09 | 30.12 | 1618 | 119.86 | 30.06 |
| 119 | 120.24 | 27.63 | 619 | 120.61 | 29.41 | 1119 | 122.09 | 30.12 | 1619 | 119.83 | 30.06 |
| 120 | 120.27 | 27.64 | 620 | 120.63 | 29.36 | 1120 | 122.08 | 30.13 | 1620 | 119.83 | 30.11 |
| 121 | 120.46 | 30.23 | 621 | 119.81 | 28.93 | 1121 | 121.21 | 28.09 | 1621 | 119.69 | 30.33 |
| 122 | 120.49 | 30.21 | 622 | 119.79 | 28.88 | 1122 | 121.22 | 28.10 | 1622 | 119.68 | 30.37 |
| 123 | 120.47 | 30.21 | 623 | 119.73 | 28.95 | 1123 | 121.21 | 28.10 | 1623 | 119.63 | 30.40 |
| 124 | 120.47 | 30.21 | 624 | 119.74 | 28.89 | 1124 | 121.20 | 28.10 | 1624 | 119.66 | 30.38 |
| 125 | 120.46 | 30.27 | 625 | 119.76 | 28.76 | 1125 | 121.17 | 28.14 | 1625 | 119.80 | 30.15 |
| 126 | 120.46 | 30.27 | 626 | 119.77 | 28.86 | 1126 | 121.20 | 28.18 | 1626 | 119.84 | 30.19 |
| 127 | 120.47 | 30.24 | 627 | 119.77 | 28.79 | 1127 | 121.19 | 28.17 | 1627 | 119.81 | 30.19 |

---

---

|     |        |       |     |        |       |      |        |       |      |        |       |
|-----|--------|-------|-----|--------|-------|------|--------|-------|------|--------|-------|
| 128 | 120.47 | 30.25 | 628 | 119.76 | 28.83 | 1128 | 121.17 | 28.15 | 1628 | 119.79 | 30.19 |
| 129 | 120.38 | 30.31 | 629 | 119.67 | 28.80 | 1129 | 121.19 | 28.11 | 1629 | 119.46 | 30.19 |
| 130 | 120.40 | 30.32 | 630 | 119.67 | 28.79 | 1130 | 121.21 | 28.09 | 1630 | 119.48 | 30.20 |
| 131 | 120.42 | 30.32 | 631 | 119.66 | 28.77 | 1131 | 121.18 | 28.10 | 1631 | 119.48 | 30.20 |
| 132 | 128.42 | 30.32 | 632 | 119.62 | 28.77 | 1132 | 121.18 | 28.12 | 1632 | 119.52 | 30.17 |
| 133 | 120.33 | 30.27 | 633 | 119.86 | 28.88 | 1133 | 121.13 | 28.11 | 1633 | 119.30 | 30.19 |
| 134 | 120.35 | 30.27 | 634 | 119.88 | 28.87 | 1134 | 121.15 | 28.12 | 1634 | 119.31 | 30.19 |
| 135 | 120.34 | 30.27 | 635 | 119.86 | 28.84 | 1135 | 121.14 | 28.11 | 1635 | 119.31 | 30.21 |
| 136 | 120.33 | 30.26 | 636 | 119.89 | 28.85 | 1136 | 121.12 | 28.11 | 1636 | 119.33 | 30.19 |
| 137 | 120.34 | 30.30 | 637 | 119.56 | 28.63 | 1137 | 121.12 | 28.05 | 1637 | 118.95 | 30.31 |
| 138 | 120.34 | 30.30 | 638 | 119.57 | 28.65 | 1138 | 121.22 | 28.09 | 1638 | 118.97 | 30.31 |
| 139 | 120.33 | 30.28 | 639 | 119.54 | 28.71 | 1139 | 121.18 | 28.06 | 1639 | 119.00 | 30.30 |
| 140 | 120.33 | 30.29 | 640 | 119.57 | 28.67 | 1140 | 121.20 | 28.06 | 1640 | 118.96 | 30.30 |
| 141 | 120.55 | 30.69 | 641 | 119.61 | 29.32 | 1141 | 121.17 | 28.08 | 1641 | 121.37 | 29.28 |
| 142 | 120.49 | 30.68 | 642 | 119.58 | 29.31 | 1142 | 121.04 | 29.24 | 1642 | 121.37 | 29.28 |
| 143 | 120.49 | 30.66 | 643 | 119.58 | 29.30 | 1143 | 121.03 | 29.24 | 1643 | 121.35 | 29.28 |
| 144 | 120.46 | 30.67 | 644 | 119.59 | 29.29 | 1144 | 121.05 | 29.24 | 1644 | 121.38 | 29.29 |
| 145 | 120.50 | 30.53 | 645 | 119.53 | 29.28 | 1145 | 121.21 | 29.06 | 1645 | 121.67 | 29.33 |
| 146 | 120.48 | 30.52 | 646 | 119.52 | 29.29 | 1146 | 121.20 | 29.05 | 1646 | 121.69 | 29.32 |
| 147 | 120.48 | 30.50 | 647 | 119.54 | 29.27 | 1147 | 121.20 | 29.05 | 1647 | 121.69 | 29.38 |
| 148 | 120.42 | 30.54 | 648 | 119.53 | 29.27 | 1148 | 121.20 | 29.06 | 1648 | 121.68 | 29.30 |
| 149 | 120.37 | 30.65 | 649 | 119.43 | 29.20 | 1149 | 121.14 | 29.11 | 1649 | 121.59 | 29.31 |
| 150 | 120.38 | 30.65 | 650 | 119.51 | 29.21 | 1150 | 121.16 | 29.11 | 1650 | 121.57 | 29.31 |
| 151 | 120.40 | 30.63 | 651 | 119.51 | 29.19 | 1151 | 121.12 | 29.11 | 1651 | 121.54 | 29.34 |
| 152 | 120.42 | 30.64 | 652 | 119.52 | 29.17 | 1152 | 121.11 | 29.12 | 1652 | 121.59 | 29.32 |
| 153 | 120.53 | 30.74 | 653 | 119.39 | 29.24 | 1153 | 120.79 | 29.11 | 1653 | 121.29 | 29.13 |
| 154 | 120.52 | 30.72 | 654 | 119.29 | 29.22 | 1154 | 120.79 | 29.11 | 1654 | 121.29 | 29.13 |
| 155 | 120.52 | 30.71 | 655 | 119.29 | 29.23 | 1155 | 120.80 | 29.12 | 1655 | 121.32 | 29.18 |
| 156 | 120.48 | 30.72 | 656 | 119.30 | 29.25 | 1156 | 120.80 | 29.12 | 1656 | 121.33 | 29.16 |
| 157 | 120.63 | 30.59 | 657 | 119.30 | 29.24 | 1157 | 120.94 | 29.24 | 1657 | 121.35 | 29.45 |
| 158 | 120.59 | 30.55 | 658 | 119.33 | 29.24 | 1158 | 120.94 | 29.23 | 1658 | 121.31 | 29.41 |
| 159 | 120.60 | 30.56 | 659 | 119.36 | 29.21 | 1159 | 120.95 | 29.23 | 1659 | 121.34 | 29.41 |
| 160 | 120.60 | 30.57 | 660 | 119.35 | 29.22 | 1160 | 121.93 | 29.24 | 1660 | 121.30 | 29.45 |
| 161 | 119.43 | 30.56 | 661 | 118.44 | 29.08 | 1161 | 120.10 | 28.70 | 1661 | 121.36 | 30.16 |
| 162 | 119.38 | 30.57 | 662 | 118.44 | 29.06 | 1162 | 120.07 | 28.70 | 1662 | 121.37 | 30.17 |
| 163 | 119.36 | 30.56 | 663 | 118.44 | 29.05 | 1163 | 120.11 | 28.66 | 1663 | 121.34 | 30.17 |
| 164 | 119.34 | 30.52 | 664 | 118.44 | 29.05 | 1164 | 120.13 | 28.67 | 1664 | 121.37 | 30.15 |
| 165 | 119.78 | 30.78 | 665 | 118.43 | 29.24 | 1165 | 120.06 | 28.68 | 1665 | 121.30 | 30.23 |
| 166 | 119.78 | 30.81 | 666 | 118.41 | 29.23 | 1166 | 120.05 | 28.68 | 1666 | 121.32 | 30.24 |
| 167 | 119.77 | 30.77 | 667 | 118.39 | 29.21 | 1167 | 120.04 | 28.68 | 1667 | 121.31 | 30.23 |
| 168 | 119.77 | 30.79 | 668 | 118.38 | 29.19 | 1168 | 120.06 | 28.68 | 1668 | 121.30 | 30.23 |
| 169 | 119.62 | 30.83 | 669 | 118.45 | 29.27 | 1169 | 120.13 | 28.66 | 1669 | 121.30 | 30.19 |
| 170 | 119.57 | 30.82 | 670 | 118.46 | 29.26 | 1170 | 120.16 | 28.65 | 1670 | 121.32 | 30.18 |

---

|     |        |       |     |        |       |      |        |       |      |        |       |
|-----|--------|-------|-----|--------|-------|------|--------|-------|------|--------|-------|
| 171 | 119.57 | 30.81 | 671 | 118.51 | 29.30 | 1171 | 120.16 | 28.65 | 1671 | 121.30 | 30.19 |
| 172 | 119.65 | 30.84 | 672 | 118.50 | 29.29 | 1172 | 120.20 | 28.66 | 1672 | 121.31 | 30.18 |
| 173 | 119.63 | 30.53 | 673 | 118.12 | 29.19 | 1173 | 120.16 | 28.75 | 1673 | 121.13 | 30.22 |
| 174 | 119.60 | 30.53 | 674 | 118.11 | 29.16 | 1174 | 120.16 | 28.76 | 1674 | 121.12 | 30.20 |
| 175 | 119.68 | 30.52 | 675 | 118.13 | 29.18 | 1175 | 120.17 | 28.76 | 1675 | 121.12 | 30.20 |
| 176 | 119.67 | 30.50 | 676 | 118.11 | 29.22 | 1176 | 120.17 | 28.75 | 1676 | 121.12 | 30.20 |
| 177 | 119.56 | 30.67 | 677 | 118.25 | 29.00 | 1177 | 120.26 | 28.51 | 1677 | 121.37 | 30.27 |
| 178 | 119.56 | 30.64 | 678 | 118.22 | 29.03 | 1178 | 120.27 | 28.53 | 1678 | 121.32 | 30.26 |
| 179 | 119.51 | 30.69 | 679 | 118.23 | 29.02 | 1179 | 120.26 | 28.52 | 1679 | 121.35 | 30.27 |
| 180 | 119.55 | 30.68 | 680 | 118.25 | 29.00 | 1180 | 120.24 | 28.52 | 1680 | 121.33 | 30.25 |
| 181 | 120.46 | 29.76 | 681 | 118.51 | 28.65 | 1181 | 119.39 | 28.51 | 1681 | 120.63 | 27.90 |
| 182 | 120.45 | 29.74 | 682 | 118.52 | 28.64 | 1182 | 119.40 | 28.50 | 1682 | 120.62 | 27.90 |
| 183 | 120.48 | 29.78 | 683 | 118.56 | 28.66 | 1183 | 119.39 | 28.50 | 1683 | 120.64 | 27.90 |
| 184 | 120.44 | 29.73 | 684 | 118.50 | 28.66 | 1184 | 119.41 | 28.49 | 1684 | 120.62 | 27.90 |
| 185 | 120.22 | 29.64 | 685 | 118.66 | 28.59 | 1185 | 119.43 | 28.39 | 1685 | 120.47 | 28.00 |
| 186 | 120.22 | 29.65 | 686 | 118.66 | 28.60 | 1186 | 119.43 | 28.40 | 1686 | 120.48 | 28.02 |
| 187 | 120.24 | 29.64 | 687 | 118.65 | 28.59 | 1187 | 119.45 | 28.36 | 1687 | 120.47 | 28.02 |
| 188 | 120.21 | 29.67 | 688 | 118.60 | 28.61 | 1188 | 119.44 | 28.40 | 1688 | 120.48 | 28.01 |
| 189 | 120.49 | 29.43 | 689 | 118.64 | 28.77 | 1189 | 119.64 | 28.35 | 1689 | 120.67 | 27.88 |
| 190 | 120.49 | 29.43 | 690 | 118.70 | 28.81 | 1190 | 119.68 | 28.34 | 1690 | 120.67 | 27.88 |
| 191 | 120.50 | 29.43 | 691 | 118.73 | 28.79 | 1191 | 119.65 | 28.36 | 1691 | 120.67 | 27.89 |
| 192 | 120.49 | 29.43 | 692 | 118.70 | 28.79 | 1192 | 119.68 | 28.34 | 1692 | 120.67 | 27.88 |
| 193 | 120.33 | 29.57 | 693 | 118.53 | 28.45 | 1193 | 119.38 | 28.54 | 1693 | 120.93 | 27.96 |
| 194 | 120.34 | 29.56 | 694 | 118.51 | 28.44 | 1194 | 119.38 | 28.55 | 1694 | 120.59 | 27.95 |
| 195 | 120.31 | 29.61 | 695 | 118.49 | 28.49 | 1195 | 119.76 | 28.56 | 1695 | 120.60 | 27.94 |
| 196 | 120.27 | 29.56 | 696 | 118.54 | 28.60 | 1196 | 119.39 | 28.67 | 1696 | 120.62 | 27.95 |
| 197 | 120.34 | 29.88 | 697 | 118.29 | 28.70 | 1197 | 119.52 | 28.36 | 1697 | 120.70 | 27.92 |
| 198 | 120.40 | 29.94 | 698 | 115.03 | 27.07 | 1198 | 119.45 | 28.32 | 1698 | 120.71 | 27.92 |
| 199 | 120.38 | 29.92 | 699 | 118.53 | 28.77 | 1199 | 119.45 | 28.32 | 1699 | 120.71 | 27.91 |
| 200 | 120.33 | 29.93 | 700 | 118.53 | 28.73 | 1200 | 119.44 | 28.31 | 1700 | 120.70 | 27.91 |
| 201 | 120.86 | 29.64 | 701 | 118.90 | 28.94 | 1201 | 120.00 | 30.00 | 1701 | 120.69 | 28.08 |
| 202 | 120.90 | 29.64 | 702 | 122.21 | 30.30 | 1202 | 120.00 | 30.00 | 1702 | 120.69 | 28.11 |
| 203 | 120.89 | 29.63 | 703 | 122.22 | 30.31 | 1203 | 120.00 | 30.00 | 1703 | 120.69 | 28.08 |
| 204 | 120.88 | 28.64 | 704 | 122.22 | 30.32 | 1204 | 120.00 | 30.00 | 1704 | 120.68 | 28.07 |
| 205 | 120.74 | 29.53 | 705 | 122.14 | 30.31 | 1205 | 119.00 | 29.00 | 1705 | 120.76 | 28.20 |
| 206 | 120.70 | 29.51 | 706 | 122.18 | 30.30 | 1206 | 119.00 | 29.00 | 1706 | 120.74 | 28.18 |
| 207 | 120.68 | 29.49 | 707 | 122.16 | 30.29 | 1207 | 119.00 | 29.00 | 1707 | 120.76 | 28.21 |
| 208 | 120.75 | 29.54 | 708 | 122.15 | 30.30 | 1208 | 119.00 | 29.00 | 1708 | 120.78 | 28.23 |
| 209 | 120.85 | 29.78 | 709 | 122.13 | 30.30 | 1209 | 119.00 | 29.00 | 1709 | 120.70 | 28.48 |
| 210 | 120.84 | 29.76 | 710 | 122.29 | 30.29 | 1210 | 119.00 | 29.00 | 1710 | 120.71 | 28.47 |
| 211 | 120.82 | 29.74 | 711 | 122.11 | 30.31 | 1211 | 119.00 | 29.00 | 1711 | 120.72 | 28.46 |
| 212 | 120.80 | 29.75 | 712 | 122.07 | 30.30 | 1212 | 119.00 | 29.00 | 1712 | 120.73 | 28.45 |
| 213 | 120.64 | 29.54 | 713 | 122.31 | 30.25 | 1213 | 119.00 | 30.00 | 1713 | 120.76 | 28.32 |

|     |        |       |     |        |       |      |        |       |      |        |       |
|-----|--------|-------|-----|--------|-------|------|--------|-------|------|--------|-------|
| 214 | 120.64 | 29.54 | 714 | 122.29 | 30.25 | 1214 | 119.00 | 30.00 | 1714 | 120.75 | 28.32 |
| 215 | 120.65 | 29.54 | 715 | 122.29 | 30.26 | 1215 | 120.00 | 29.00 | 1715 | 120.77 | 28.31 |
| 216 | 120.64 | 29.55 | 716 | 122.59 | 30.44 | 1216 | 119.00 | 30.00 | 1716 | 120.78 | 28.32 |
| 217 | 120.60 | 29.36 | 717 | 122.40 | 30.27 | 1217 | 119.00 | 29.00 | 1717 | 120.56 | 28.30 |
| 218 | 120.62 | 29.41 | 718 | 122.50 | 30.74 | 1218 | 119.00 | 29.00 | 1718 | 120.56 | 28.32 |
| 219 | 120.61 | 29.41 | 719 | 122.65 | 30.72 | 1219 | 119.00 | 29.00 | 1719 | 120.56 | 28.32 |
| 220 | 120.63 | 29.36 | 720 | 122.41 | 30.43 | 1220 | 119.00 | 29.00 | 1720 | 120.23 | 28.31 |
| 221 | 119.82 | 28.98 | 721 | 122.43 | 30.43 | 1221 | 119.58 | 30.29 | 1721 | 120.95 | 30.59 |
| 222 | 119.87 | 28.93 | 722 | 121.29 | 28.20 | 1222 | 119.57 | 30.30 | 1722 | 120.90 | 30.60 |
| 223 | 119.84 | 28.99 | 723 | 121.31 | 28.18 | 1223 | 119.58 | 30.33 | 1723 | 120.92 | 30.60 |
| 224 | 119.84 | 28.96 | 724 | 121.31 | 28.19 | 1224 | 119.62 | 30.29 | 1724 | 120.95 | 30.61 |
| 225 | 119.97 | 28.83 | 725 | 121.38 | 28.25 | 1225 | 119.39 | 30.16 | 1725 | 120.93 | 30.42 |
| 226 | 119.96 | 28.85 | 726 | 121.38 | 28.27 | 1226 | 119.38 | 30.13 | 1726 | 120.93 | 30.42 |
| 227 | 119.93 | 28.86 | 727 | 121.38 | 28.26 | 1227 | 119.36 | 30.20 | 1727 | 120.91 | 30.42 |
| 228 | 119.94 | 28.88 | 728 | 121.38 | 28.25 | 1228 | 119.35 | 30.18 | 1728 | 120.90 | 30.42 |
| 229 | 119.72 | 28.85 | 729 | 121.22 | 28.19 | 1229 | 119.39 | 30.29 | 1729 | 120.80 | 30.57 |
| 230 | 119.69 | 28.84 | 730 | 121.24 | 28.20 | 1230 | 119.25 | 30.30 | 1730 | 120.83 | 30.61 |
| 231 | 119.74 | 28.83 | 731 | 121.25 | 28.19 | 1231 | 119.37 | 30.26 | 1731 | 120.88 | 30.60 |
| 232 | 119.71 | 28.80 | 732 | 121.22 | 28.19 | 1232 | 121.34 | 29.71 | 1732 | 120.89 | 30.59 |
| 233 | 119.59 | 28.74 | 733 | 121.34 | 28.30 | 1233 | 119.24 | 30.11 | 1733 | 120.82 | 30.54 |
| 234 | 119.61 | 28.66 | 734 | 121.29 | 28.26 | 1234 | 119.24 | 30.10 | 1734 | 120.87 | 30.54 |
| 235 | 119.58 | 28.67 | 735 | 121.33 | 28.30 | 1235 | 119.24 | 30.12 | 1735 | 120.86 | 30.52 |
| 236 | 119.61 | 28.69 | 736 | 121.29 | 28.28 | 1236 | 119.24 | 30.13 | 1736 | 120.85 | 30.50 |
| 237 | 119.60 | 28.64 | 737 | 121.35 | 28.17 | 1237 | 119.04 | 30.14 | 1737 | 120.82 | 30.44 |
| 238 | 119.60 | 28.60 | 738 | 121.35 | 28.16 | 1238 | 119.07 | 30.14 | 1738 | 120.82 | 30.49 |
| 239 | 119.55 | 28.54 | 739 | 121.34 | 28.17 | 1239 | 119.00 | 30.10 | 1739 | 120.82 | 30.48 |
| 240 | 119.54 | 28.60 | 740 | 121.34 | 28.17 | 1240 | 119.03 | 30.13 | 1740 | 120.82 | 30.48 |
| 241 | 119.65 | 29.34 | 741 | 121.04 | 29.25 | 1241 | 121.40 | 29.49 | 1741 | 121.12 | 30.65 |
| 242 | 119.63 | 29.35 | 742 | 121.03 | 29.25 | 1242 | 121.25 | 29.29 | 1742 | 121.08 | 30.65 |
| 243 | 119.65 | 29.34 | 743 | 121.12 | 29.20 | 1243 | 121.43 | 29.44 | 1743 | 121.10 | 30.66 |
| 244 | 119.63 | 29.34 | 744 | 121.04 | 29.22 | 1244 | 121.24 | 29.08 | 1744 | 121.10 | 30.66 |
| 245 | 119.26 | 29.18 | 745 | 121.21 | 29.04 | 1245 | 121.61 | 29.79 | 1745 | 121.21 | 30.68 |
| 246 | 119.26 | 29.18 | 746 | 121.21 | 29.06 | 1246 | 121.38 | 29.13 | 1746 | 121.23 | 30.70 |
| 247 | 119.25 | 29.18 | 747 | 121.20 | 29.05 | 1247 | 121.36 | 29.15 | 1747 | 121.25 | 30.73 |
| 248 | 119.25 | 29.19 | 748 | 121.19 | 29.06 | 1248 | 121.37 | 29.13 | 1748 | 121.25 | 30.72 |
| 249 | 119.78 | 29.36 | 749 | 121.14 | 29.11 | 1249 | 121.12 | 29.34 | 1749 | 121.20 | 30.73 |
| 250 | 119.77 | 29.36 | 750 | 121.16 | 29.11 | 1250 | 121.31 | 29.12 | 1750 | 121.19 | 30.76 |
| 251 | 119.80 | 29.36 | 751 | 121.12 | 19.11 | 1251 | 121.30 | 29.14 | 1751 | 121.23 | 30.74 |
| 252 | 119.80 | 29.37 | 752 | 121.12 | 29.11 | 1252 | 121.23 | 29.19 | 1752 | 121.12 | 30.65 |
| 253 | 119.75 | 29.34 | 753 | 120.79 | 29.10 | 1253 | 121.19 | 29.12 | 1753 | 121.10 | 30.75 |
| 254 | 119.76 | 29.33 | 754 | 120.79 | 29.13 | 1254 | 121.19 | 29.13 | 1754 | 121.12 | 30.73 |
| 255 | 119.20 | 29.33 | 755 | 120.79 | 29.10 | 1255 | 121.19 | 29.13 | 1755 | 121.13 | 30.77 |
| 256 | 119.77 | 29.36 | 756 | 120.79 | 29.10 | 1256 | 121.18 | 29.11 | 1756 | 121.16 | 30.75 |

---

|     |        |       |     |        |       |      |        |       |      |        |       |
|-----|--------|-------|-----|--------|-------|------|--------|-------|------|--------|-------|
| 257 | 119.32 | 29.11 | 757 | 120.93 | 29.24 | 1257 | 121.33 | 29.25 | 1757 | 121.08 | 30.79 |
| 258 | 119.31 | 29.15 | 758 | 120.94 | 29.24 | 1258 | 121.33 | 29.24 | 1758 | 121.07 | 30.82 |
| 259 | 119.32 | 29.13 | 759 | 120.95 | 29.23 | 1259 | 121.33 | 29.24 | 1759 | 121.05 | 30.77 |
| 260 | 119.33 | 29.12 | 760 | 120.93 | 29.23 | 1260 | 121.33 | 29.27 | 1760 | 121.10 | 30.80 |
| 261 | 118.39 | 29.01 | 761 | 120.10 | 28.67 | 1261 | 121.13 | 30.18 | 1761 | 119.73 | 31.02 |
| 262 | 118.40 | 29.01 | 762 | 120.06 | 28.64 | 1262 | 121.12 | 30.19 | 1762 | 119.73 | 31.02 |
| 263 | 118.35 | 29.03 | 763 | 120.07 | 28.66 | 1263 | 121.11 | 30.02 | 1763 | 119.78 | 31.07 |
| 264 | 118.36 | 29.05 | 764 | 120.26 | 28.18 | 1264 | 121.11 | 30.18 | 1764 | 119.84 | 31.04 |
| 265 | 118.39 | 29.30 | 765 | 120.04 | 28.70 | 1265 | 121.39 | 30.27 | 1765 | 119.89 | 30.81 |
| 266 | 118.37 | 29.26 | 766 | 120.30 | 28.67 | 1266 | 121.35 | 30.25 | 1766 | 119.91 | 30.83 |
| 267 | 118.39 | 29.29 | 767 | 120.36 | 28.54 | 1267 | 121.32 | 30.26 | 1767 | 119.92 | 30.79 |
| 268 | 118.40 | 29.32 | 768 | 120.48 | 28.69 | 1268 | 121.35 | 30.27 | 1768 | 119.95 | 30.83 |
| 269 | 118.41 | 29.22 | 769 | 120.29 | 28.59 | 1269 | 121.33 | 30.24 | 1769 | 119.92 | 31.11 |
| 270 | 118.42 | 29.22 | 770 | 120.34 | 28.61 | 1270 | 121.31 | 30.22 | 1770 | 119.94 | 31.10 |
| 271 | 118.37 | 29.21 | 771 | 120.31 | 28.57 | 1271 | 121.31 | 30.23 | 1771 | 119.57 | 31.53 |
| 272 | 118.37 | 29.20 | 772 | 120.33 | 28.61 | 1272 | 121.30 | 30.24 | 1772 | 119.73 | 31.02 |
| 273 | 118.26 | 29.15 | 773 | 120.24 | 28.82 | 1273 | 121.33 | 30.19 | 1773 | 119.73 | 31.02 |
| 274 | 118.28 | 29.16 | 774 | 120.24 | 28.16 | 1274 | 121.30 | 30.17 | 1774 | 119.67 | 30.96 |
| 275 | 118.32 | 29.05 | 775 | 120.24 | 28.82 | 1275 | 121.33 | 30.18 | 1775 | 119.73 | 30.91 |
| 276 | 118.31 | 29.07 | 776 | 120.24 | 28.82 | 1276 | 121.30 | 30.19 | 1776 | 119.71 | 31.00 |
| 277 | 118.25 | 29.18 | 777 | 120.14 | 28.71 | 1277 | 121.36 | 30.17 | 1777 | 119.89 | 30.95 |
| 278 | 118.23 | 29.20 | 778 | 120.12 | 28.73 | 1278 | 121.35 | 30.16 | 1778 | 119.85 | 30.92 |
| 279 | 118.23 | 29.22 | 779 | 120.14 | 28.71 | 1279 | 121.36 | 30.15 | 1779 | 119.88 | 30.87 |
| 280 | 118.22 | 29.24 | 780 | 120.12 | 28.69 | 1280 | 121.35 | 30.17 | 1780 | 119.85 | 30.88 |
| 281 | 118.53 | 28.66 | 781 | 119.38 | 28.52 | 1281 | 120.47 | 28.03 | 1781 | 120.65 | 30.05 |
| 282 | 118.54 | 28.65 | 782 | 119.39 | 28.50 | 1282 | 120.48 | 28.03 | 1782 | 120.64 | 30.06 |
| 283 | 118.46 | 28.67 | 783 | 119.39 | 28.51 | 1283 | 120.50 | 28.05 | 1783 | 120.64 | 30.04 |
| 284 | 118.51 | 28.64 | 784 | 119.41 | 28.49 | 1284 | 120.43 | 28.03 | 1784 | 120.69 | 30.04 |
| 285 | 118.69 | 28.61 | 785 | 119.47 | 28.47 | 1285 | 120.67 | 27.88 | 1785 | 120.73 | 30.03 |
| 286 | 118.62 | 28.59 | 786 | 119.47 | 28.48 | 1286 | 120.67 | 27.87 | 1786 | 120.73 | 30.01 |
| 287 | 118.59 | 28.61 | 787 | 119.47 | 28.48 | 1287 | 120.67 | 27.89 | 1787 | 120.68 | 30.08 |
| 288 | 118.63 | 28.61 | 788 | 119.47 | 28.49 | 1288 | 120.81 | 27.99 | 1788 | 120.68 | 30.07 |
| 289 | 118.69 | 28.78 | 789 | 119.64 | 28.35 | 1289 | 120.60 | 27.97 | 1789 | 120.69 | 30.07 |
| 290 | 118.72 | 28.81 | 790 | 119.68 | 28.34 | 1290 | 120.59 | 27.95 | 1790 | 120.69 | 30.08 |
| 291 | 118.66 | 28.78 | 791 | 119.66 | 28.35 | 1291 | 120.60 | 27.94 | 1791 | 120.65 | 29.98 |
| 292 | 118.74 | 28.73 | 792 | 119.69 | 28.35 | 1292 | 120.62 | 27.95 | 1792 | 120.65 | 29.98 |
| 293 | 118.72 | 28.85 | 793 | 119.26 | 28.36 | 1293 | 120.57 | 27.99 | 1793 | 120.69 | 30.00 |
| 294 | 118.70 | 28.85 | 794 | 119.29 | 28.35 | 1294 | 120.59 | 28.00 | 1794 | 120.17 | 30.00 |
| 295 | 118.68 | 28.83 | 795 | 119.25 | 28.37 | 1295 | 120.54 | 28.00 | 1795 | 120.72 | 30.02 |
| 296 | 118.69 | 28.84 | 796 | 119.30 | 28.35 | 1296 | 120.52 | 28.00 | 1796 | 120.71 | 30.02 |
| 297 | 118.51 | 28.79 | 797 | 119.51 | 28.36 | 1297 | 120.63 | 27.90 | 1797 | 120.71 | 29.97 |
| 298 | 118.50 | 28.73 | 798 | 119.46 | 28.32 | 1298 | 120.62 | 27.90 | 1798 | 120.74 | 29.98 |
| 299 | 118.50 | 28.71 | 799 | 119.46 | 28.31 | 1299 | 120.66 | 27.92 | 1799 | 120.72 | 29.97 |

---

|     |        |       |     |        |       |      |        |       |      |        |       |
|-----|--------|-------|-----|--------|-------|------|--------|-------|------|--------|-------|
| 300 | 118.54 | 28.75 | 800 | 119.44 | 28.32 | 1300 | 120.62 | 27.90 | 1800 | 120.73 | 29.96 |
| 301 | 122.15 | 30.31 | 801 | 119.57 | 29.83 | 1301 | 120.69 | 28.07 | 1801 | 120.79 | 29.98 |
| 302 | 122.17 | 30.30 | 802 | 119.61 | 29.81 | 1302 | 120.69 | 28.11 | 1802 | 120.78 | 30.00 |
| 303 | 122.16 | 30.29 | 803 | 119.59 | 29.82 | 1303 | 120.69 | 28.08 | 1803 | 120.47 | 30.04 |
| 304 | 122.14 | 30.31 | 804 | 119.62 | 29.80 | 1304 | 120.68 | 28.07 | 1804 | 120.79 | 29.98 |
| 305 | 122.19 | 30.29 | 805 | 119.61 | 29.70 | 1305 | 120.76 | 28.20 | 1805 | 120.97 | 30.01 |
| 306 | 122.20 | 30.30 | 806 | 119.61 | 29.70 | 1306 | 120.74 | 28.18 | 1806 | 120.93 | 30.04 |
| 307 | 122.22 | 30.31 | 807 | 119.63 | 29.72 | 1307 | 120.75 | 28.21 | 1807 | 120.95 | 30.01 |
| 308 | 122.22 | 30.32 | 808 | 119.72 | 29.66 | 1308 | 120.78 | 28.23 | 1808 | 120.98 | 30.05 |
| 309 | 122.13 | 30.30 | 809 | 119.83 | 29.76 | 1309 | 120.71 | 28.48 | 1809 | 120.53 | 30.73 |
| 310 | 122.11 | 30.28 | 810 | 119.81 | 29.74 | 1310 | 120.71 | 28.48 | 1810 | 120.54 | 30.82 |
| 311 | 122.11 | 30.31 | 811 | 119.76 | 29.80 | 1311 | 120.72 | 28.46 | 1811 | 120.55 | 30.84 |
| 312 | 122.06 | 30.30 | 812 | 119.78 | 29.81 | 1312 | 120.73 | 28.45 | 1812 | 120.52 | 30.66 |
| 313 | 122.31 | 30.25 | 813 | 119.54 | 29.90 | 1313 | 120.76 | 28.32 | 1813 | 121.00 | 29.77 |
| 314 | 122.30 | 30.24 | 814 | 119.54 | 29.90 | 1314 | 120.75 | 28.32 | 1814 | 120.94 | 29.78 |
| 315 | 122.28 | 30.25 | 815 | 119.46 | 29.84 | 1315 | 120.77 | 28.31 | 1815 | 121.03 | 29.78 |
| 316 | 122.35 | 30.26 | 816 | 119.54 | 29.90 | 1316 | 120.78 | 28.32 | 1816 | 121.02 | 29.78 |
| 317 | 122.30 | 30.45 | 817 | 119.54 | 29.90 | 1317 | 120.56 | 28.30 | 1817 | 120.78 | 29.88 |
| 318 | 122.29 | 30.45 | 818 | 119.46 | 29.94 | 1318 | 120.56 | 28.31 | 1818 | 120.78 | 29.88 |
| 319 | 122.40 | 30.43 | 819 | 119.44 | 29.95 | 1319 | 120.56 | 28.32 | 1819 | 120.79 | 29.87 |
| 320 | 122.42 | 30.42 | 820 | 119.40 | 29.91 | 1320 | 120.57 | 28.31 | 1820 | 120.80 | 29.87 |
| 321 | 121.23 | 28.19 | 821 | 119.13 | 29.81 | 1321 | 120.78 | 30.39 | 1821 | 119.92 | 29.44 |
| 322 | 121.25 | 28.20 | 822 | 119.05 | 29.86 | 1322 | 120.81 | 30.36 | 1822 | 119.95 | 29.42 |
| 323 | 121.23 | 28.21 | 823 | 119.12 | 29.89 | 1323 | 120.80 | 30.36 | 1823 | 119.96 | 29.43 |
| 324 | 121.23 | 28.19 | 824 | 119.14 | 29.87 | 1324 | 120.79 | 30.36 | 1824 | 119.92 | 29.43 |
| 325 | 121.38 | 28.25 | 825 | 118.12 | 29.07 | 1325 | 120.75 | 30.48 | 1825 | 120.08 | 29.52 |
| 326 | 121.38 | 28.25 | 826 | 118.70 | 29.40 | 1326 | 120.78 | 30.49 | 1826 | 120.05 | 29.51 |
| 327 | 121.40 | 28.25 | 827 | 118.70 | 29.40 | 1327 | 120.79 | 30.41 | 1827 | 120.04 | 29.48 |
| 328 | 121.40 | 28.24 | 828 | 118.60 | 29.40 | 1328 | 120.79 | 30.43 | 1828 | 120.02 | 29.54 |
| 329 | 121.32 | 28.26 | 829 | 118.90 | 29.85 | 1329 | 120.64 | 30.53 | 1829 | 120.02 | 28.28 |
| 330 | 121.32 | 28.29 | 830 | 118.91 | 29.84 | 1330 | 120.67 | 30.55 | 1830 | 120.02 | 29.49 |
| 331 | 121.34 | 28.30 | 831 | 118.91 | 29.83 | 1331 | 120.70 | 30.55 | 1831 | 125.02 | 30.30 |
| 332 | 121.32 | 28.30 | 832 | 118.90 | 29.82 | 1332 | 120.71 | 30.53 | 1832 | 120.01 | 29.49 |
| 333 | 121.31 | 28.24 | 833 | 118.59 | 29.51 | 1333 | 120.57 | 30.46 | 1833 | 119.61 | 29.93 |
| 334 | 121.30 | 28.24 | 834 | 118.60 | 29.48 | 1334 | 120.59 | 30.46 | 1834 | 119.15 | 29.94 |
| 335 | 121.29 | 28.24 | 835 | 118.59 | 29.47 | 1335 | 120.58 | 30.46 | 1835 | 119.15 | 29.96 |
| 336 | 121.32 | 28.24 | 836 | 118.60 | 29.45 | 1336 | 120.56 | 30.05 | 1836 | 119.90 | 29.57 |
| 337 | 121.31 | 28.18 | 837 | 118.49 | 29.42 | 1337 | 120.58 | 30.51 | 1837 | 120.01 | 29.45 |
| 338 | 121.32 | 28.19 | 838 | 118.47 | 29.47 | 1338 | 120.58 | 30.51 | 1838 | 120.01 | 29.43 |
| 339 | 121.32 | 28.19 | 839 | 118.44 | 29.46 | 1339 | 120.55 | 30.48 | 1839 | 119.97 | 29.44 |
| 340 | 121.33 | 28.20 | 840 | 118.48 | 29.43 | 1340 | 120.56 | 30.49 | 1840 | 119.98 | 29.47 |
| 341 | 121.21 | 29.06 | 841 | 121.90 | 29.15 | 1341 | 120.45 | 30.58 | 1841 | 120.19 | 29.34 |
| 342 | 121.20 | 29.06 | 842 | 121.92 | 29.16 | 1342 | 120.46 | 30.59 | 1842 | 120.16 | 29.35 |

---

|     |        |       |     |        |       |      |        |       |      |        |       |
|-----|--------|-------|-----|--------|-------|------|--------|-------|------|--------|-------|
| 343 | 121.20 | 29.06 | 843 | 121.90 | 29.15 | 1343 | 120.48 | 30.60 | 1843 | 120.16 | 29.35 |
| 344 | 121.21 | 29.06 | 844 | 121.90 | 29.16 | 1344 | 120.47 | 30.58 | 1844 | 120.18 | 29.35 |
| 345 | 121.14 | 29.11 | 845 | 121.84 | 29.47 | 1345 | 120.53 | 30.49 | 1845 | 120.06 | 29.20 |
| 346 | 121.16 | 29.11 | 846 | 121.81 | 26.48 | 1346 | 120.54 | 30.52 | 1846 | 119.99 | 29.17 |
| 347 | 121.12 | 29.12 | 847 | 121.82 | 29.48 | 1347 | 120.56 | 30.52 | 1847 | 120.02 | 29.18 |
| 348 | 121.12 | 29.11 | 848 | 121.76 | 29.48 | 1348 | 120.54 | 30.55 | 1848 | 120.25 | 29.15 |
| 349 | 121.04 | 29.24 | 849 | 121.76 | 29.29 | 1349 | 120.56 | 30.73 | 1849 | 120.14 | 29.40 |
| 350 | 121.04 | 29.25 | 850 | 121.75 | 29.35 | 1350 | 120.56 | 30.69 | 1850 | 120.12 | 29.83 |
| 351 | 121.03 | 29.25 | 851 | 121.77 | 29.38 | 1351 | 120.54 | 30.72 | 1851 | 120.18 | 29.39 |
| 352 | 121.12 | 29.24 | 852 | 121.74 | 29.40 | 1352 | 120.59 | 30.71 | 1852 | 120.17 | 29.39 |
| 353 | 120.93 | 29.24 | 853 | 121.84 | 29.21 | 1353 | 120.36 | 30.59 | 1853 | 120.11 | 29.30 |
| 354 | 120.93 | 29.24 | 854 | 121.82 | 29.22 | 1354 | 120.36 | 30.56 | 1854 | 120.23 | 29.14 |
| 355 | 120.94 | 29.24 | 855 | 121.83 | 29.21 | 1355 | 120.32 | 30.58 | 1855 | 120.43 | 29.17 |
| 356 | 120.95 | 29.23 | 856 | 121.85 | 29.20 | 1356 | 120.35 | 30.57 | 1856 | 120.12 | 29.32 |
| 357 | 120.79 | 29.10 | 857 | 121.82 | 29.12 | 1357 | 120.37 | 30.53 | 1857 | 119.94 | 29.24 |
| 358 | 120.79 | 29.10 | 858 | 121.81 | 29.12 | 1358 | 120.36 | 30.49 | 1858 | 119.96 | 29.27 |
| 359 | 120.79 | 29.10 | 859 | 121.79 | 29.14 | 1359 | 120.35 | 30.52 | 1859 | 119.98 | 29.25 |
| 360 | 120.79 | 29.10 | 860 | 121.81 | 29.13 | 1360 | 120.36 | 30.50 | 1860 | 119.96 | 29.27 |
| 361 | 120.09 | 28.63 | 861 | 121.32 | 29.98 | 1361 | 120.22 | 30.53 | 1861 | 118.71 | 28.97 |
| 362 | 120.06 | 28.64 | 862 | 121.30 | 30.00 | 1362 | 120.24 | 30.53 | 1862 | 118.69 | 28.94 |
| 363 | 120.07 | 28.66 | 863 | 121.33 | 29.98 | 1363 | 120.17 | 30.60 | 1863 | 118.70 | 28.91 |
| 364 | 120.10 | 28.67 | 864 | 121.35 | 29.98 | 1364 | 120.18 | 30.56 | 1864 | 118.73 | 28.94 |
| 365 | 120.04 | 28.71 | 865 | 121.43 | 29.86 | 1365 | 119.96 | 30.49 | 1865 | 118.65 | 29.09 |
| 366 | 120.04 | 28.70 | 866 | 121.43 | 30.00 | 1366 | 119.96 | 30.52 | 1866 | 118.65 | 29.08 |
| 367 | 120.34 | 28.62 | 867 | 121.22 | 29.99 | 1367 | 119.98 | 30.52 | 1867 | 118.64 | 29.07 |
| 368 | 120.02 | 28.72 | 868 | 121.27 | 29.99 | 1368 | 119.99 | 30.48 | 1868 | 118.63 | 29.07 |
| 369 | 120.54 | 28.99 | 869 | 121.03 | 30.09 | 1369 | 120.09 | 30.52 | 1869 | 118.41 | 28.87 |
| 370 | 120.53 | 28.87 | 870 | 121.01 | 30.07 | 1370 | 120.05 | 30.59 | 1870 | 118.40 | 28.86 |
| 371 | 120.54 | 28.89 | 871 | 120.98 | 30.08 | 1371 | 120.05 | 30.56 | 1871 | 118.38 | 28.86 |
| 372 | 120.49 | 28.96 | 872 | 121.01 | 30.10 | 1372 | 120.07 | 30.56 | 1872 | 118.37 | 28.86 |
| 373 | 120.24 | 28.81 | 873 | 121.06 | 30.16 | 1373 | 120.12 | 30.63 | 1873 | 118.45 | 28.91 |
| 374 | 120.24 | 28.81 | 874 | 121.06 | 30.14 | 1374 | 120.06 | 30.64 | 1874 | 118.46 | 28.92 |
| 375 | 120.25 | 28.82 | 875 | 121.04 | 30.18 | 1375 | 120.12 | 30.61 | 1875 | 118.42 | 28.91 |
| 376 | 120.22 | 28.79 | 876 | 121.03 | 30.21 | 1376 | 120.09 | 30.62 | 1876 | 118.44 | 28.93 |
| 377 | 120.12 | 28.69 | 877 | 121.15 | 30.14 | 1377 | 119.93 | 30.58 | 1877 | 118.60 | 28.92 |
| 378 | 120.14 | 28.71 | 878 | 121.15 | 30.02 | 1378 | 119.99 | 30.57 | 1878 | 118.59 | 28.91 |
| 379 | 120.12 | 28.71 | 879 | 121.18 | 30.16 | 1379 | 119.98 | 30.56 | 1879 | 118.64 | 28.91 |
| 380 | 120.12 | 28.73 | 880 | 121.15 | 30.14 | 1380 | 120.01 | 30.58 | 1880 | 118.65 | 28.89 |
| 381 | 119.39 | 28.54 | 881 | 120.69 | 28.07 | 1381 | 120.72 | 29.96 | 1881 | 119.20 | 29.10 |
| 382 | 119.41 | 28.54 | 882 | 120.69 | 28.11 | 1382 | 120.73 | 29.98 | 1882 | 119.20 | 29.11 |
| 383 | 119.42 | 28.53 | 883 | 120.69 | 28.08 | 1383 | 120.71 | 29.97 | 1883 | 119.22 | 29.11 |
| 384 | 119.40 | 28.52 | 884 | 120.68 | 28.69 | 1384 | 120.74 | 29.98 | 1884 | 119.24 | 29.12 |
| 385 | 119.47 | 28.47 | 885 | 120.75 | 28.19 | 1385 | 120.64 | 30.04 | 1885 | 119.17 | 29.07 |

---

|     |        |       |     |        |       |      |        |       |      |        |       |
|-----|--------|-------|-----|--------|-------|------|--------|-------|------|--------|-------|
| 386 | 119.47 | 28.48 | 886 | 120.74 | 28.18 | 1386 | 120.64 | 30.04 | 1886 | 119.13 | 29.04 |
| 387 | 119.47 | 28.49 | 887 | 120.75 | 28.21 | 1387 | 120.65 | 30.06 | 1887 | 119.12 | 29.07 |
| 388 | 119.47 | 28.50 | 888 | 120.78 | 28.23 | 1388 | 120.64 | 30.06 | 1888 | 119.09 | 29.09 |
| 389 | 119.64 | 28.35 | 889 | 120.70 | 28.48 | 1389 | 120.68 | 30.07 | 1889 | 119.30 | 29.06 |
| 390 | 119.64 | 28.34 | 890 | 120.71 | 28.47 | 1390 | 120.68 | 30.06 | 1890 | 119.26 | 29.26 |
| 391 | 119.66 | 28.35 | 891 | 120.72 | 28.46 | 1391 | 120.68 | 30.08 | 1891 | 119.27 | 29.06 |
| 392 | 119.69 | 28.35 | 892 | 120.73 | 28.45 | 1392 | 120.68 | 30.07 | 1892 | 119.28 | 29.05 |
| 393 | 119.28 | 28.37 | 893 | 120.76 | 28.32 | 1393 | 120.64 | 29.99 | 1893 | 119.19 | 28.92 |
| 394 | 119.29 | 28.35 | 894 | 120.76 | 28.32 | 1394 | 120.64 | 29.99 | 1894 | 119.17 | 28.88 |
| 395 | 119.29 | 28.36 | 895 | 120.77 | 28.31 | 1395 | 120.65 | 29.98 | 1895 | 119.18 | 28.85 |
| 396 | 119.25 | 28.37 | 896 | 120.80 | 28.32 | 1396 | 120.65 | 29.98 | 1896 | 119.16 | 28.90 |
| 397 | 119.52 | 28.36 | 897 | 120.56 | 28.31 | 1397 | 120.73 | 30.02 | 1897 | 119.13 | 29.04 |
| 398 | 119.46 | 28.32 | 898 | 120.56 | 28.31 | 1398 | 120.72 | 30.01 | 1898 | 119.09 | 29.09 |
| 399 | 119.45 | 28.32 | 899 | 120.56 | 28.32 | 1399 | 120.72 | 30.02 | 1899 | 119.12 | 29.07 |
| 400 | 119.44 | 28.32 | 900 | 120.57 | 28.31 | 1400 | 120.71 | 30.02 | 1900 | 119.17 | 29.07 |
| 401 | 119.57 | 29.83 | 901 | 120.54 | 27.51 | 1401 | 120.99 | 30.00 | 1901 | 122.82 | 30.72 |
| 402 | 119.61 | 29.81 | 902 | 120.56 | 27.52 | 1402 | 120.47 | 29.55 | 1902 | 122.83 | 30.73 |
| 403 | 119.59 | 29.82 | 903 | 120.55 | 27.52 | 1403 | 120.86 | 30.03 | 1903 | 122.82 | 30.72 |
| 404 | 119.62 | 29.80 | 904 | 120.56 | 27.52 | 1404 | 120.49 | 29.57 | 1904 | 122.80 | 30.79 |
| 405 | 119.61 | 29.70 | 905 | 120.19 | 28.08 | 1405 | 120.83 | 29.90 | 1905 | 122.08 | 30.60 |
| 406 | 119.61 | 29.69 | 906 | 123.09 | 30.24 | 1406 | 120.82 | 29.90 | 1906 | 122.09 | 30.60 |
| 407 | 119.63 | 29.72 | 907 | 120.63 | 27.46 | 1407 | 120.83 | 29.90 | 1907 | 122.08 | 30.59 |
| 408 | 119.72 | 29.66 | 908 | 130.16 | 28.15 | 1408 | 120.82 | 29.88 | 1908 | 122.08 | 30.59 |
| 409 | 119.83 | 29.76 | 909 | 125.30 | 34.65 | 1409 | 120.84 | 30.09 | 1909 | 122.78 | 30.72 |
| 410 | 119.81 | 29.74 | 910 | 120.52 | 27.75 | 1410 | 120.83 | 30.09 | 1910 | 122.79 | 30.72 |
| 411 | 119.75 | 29.80 | 911 | 125.12 | 34.55 | 1411 | 120.82 | 30.09 | 1911 | 122.79 | 30.73 |
| 412 | 119.78 | 29.80 | 912 | 125.17 | 34.70 | 1412 | 120.81 | 30.09 | 1912 | 122.79 | 30.72 |
| 413 | 119.54 | 29.90 | 913 | 127.37 | 26.30 | 1413 | 120.04 | 29.97 | 1913 | 122.57 | 30.66 |
| 414 | 119.54 | 29.90 | 914 | 124.48 | 27.58 | 1414 | 120.08 | 29.97 | 1914 | 122.57 | 30.68 |
| 415 | 119.46 | 29.84 | 915 | 120.35 | 26.20 | 1415 | 120.07 | 29.99 | 1915 | 122.56 | 30.67 |
| 416 | 119.54 | 29.90 | 916 | 120.35 | 26.20 | 1416 | 120.04 | 29.98 | 1916 | 122.56 | 30.66 |
| 417 | 119.46 | 29.95 | 917 | 120.47 | 27.26 | 1417 | 121.01 | 29.86 | 1917 | 122.51 | 30.71 |
| 418 | 119.46 | 29.94 | 918 | 120.47 | 27.26 | 1418 | 121.02 | 29.83 | 1918 | 122.51 | 30.71 |
| 419 | 119.44 | 29.95 | 919 | 120.47 | 27.26 | 1419 | 121.03 | 29.82 | 1919 | 122.53 | 30.71 |
| 420 | 119.40 | 29.91 | 920 | 120.47 | 27.26 | 1420 | 121.07 | 29.84 | 1920 | 122.53 | 30.72 |
| 421 | 119.16 | 29.83 | 921 | 120.78 | 30.39 | 1421 | 120.73 | 29.23 | 1921 | 121.62 | 28.97 |
| 422 | 119.09 | 29.85 | 922 | 120.81 | 30.36 | 1422 | 120.73 | 29.24 | 1922 | 121.63 | 28.97 |
| 423 | 119.11 | 29.90 | 923 | 120.80 | 30.36 | 1423 | 120.70 | 29.21 | 1923 | 121.61 | 28.97 |
| 424 | 119.13 | 29.87 | 924 | 120.79 | 30.36 | 1424 | 120.72 | 29.22 | 1924 | 121.58 | 28.96 |
| 425 | 118.75 | 29.38 | 925 | 120.77 | 30.46 | 1425 | 120.58 | 29.01 | 1925 | 121.52 | 29.09 |
| 426 | 118.77 | 29.39 | 926 | 120.79 | 30.44 | 1426 | 120.59 | 29.01 | 1926 | 121.55 | 29.09 |
| 427 | 118.77 | 29.42 | 927 | 120.78 | 30.41 | 1427 | 120.56 | 29.01 | 1927 | 121.57 | 29.11 |
| 428 | 118.77 | 29.30 | 928 | 120.79 | 30.43 | 1428 | 120.56 | 29.00 | 1928 | 121.60 | 29.06 |

|     |        |       |     |        |       |      |        |       |      |        |       |
|-----|--------|-------|-----|--------|-------|------|--------|-------|------|--------|-------|
| 429 | 118.84 | 29.83 | 929 | 120.64 | 30.53 | 1429 | 120.47 | 28.93 | 1929 | 121.40 | 29.15 |
| 430 | 118.84 | 29.82 | 930 | 120.67 | 30.55 | 1430 | 120.46 | 28.95 | 1930 | 121.43 | 29.16 |
| 431 | 118.81 | 29.78 | 931 | 120.70 | 30.55 | 1431 | 120.49 | 28.95 | 1931 | 121.42 | 29.15 |
| 432 | 118.80 | 29.77 | 932 | 120.71 | 30.53 | 1432 | 120.45 | 28.91 | 1932 | 121.42 | 29.14 |
| 433 | 118.67 | 29.48 | 933 | 120.57 | 30.46 | 1433 | 120.66 | 29.14 | 1933 | 121.38 | 29.06 |
| 434 | 118.65 | 29.55 | 934 | 120.59 | 30.46 | 1434 | 120.65 | 29.14 | 1934 | 121.37 | 29.07 |
| 435 | 118.61 | 29.59 | 935 | 120.58 | 30.46 | 1435 | 120.70 | 29.15 | 1935 | 121.36 | 29.06 |
| 436 | 118.37 | 29.51 | 936 | 120.56 | 30.05 | 1436 | 120.66 | 29.12 | 1936 | 121.35 | 29.06 |
| 437 | 118.55 | 29.42 | 937 | 120.58 | 30.51 | 1437 | 120.41 | 28.97 | 1937 | 121.29 | 29.09 |
| 438 | 118.54 | 29.42 | 938 | 120.58 | 30.51 | 1438 | 120.38 | 28.94 | 1938 | 121.31 | 29.09 |
| 439 | 118.57 | 29.44 | 939 | 120.55 | 30.48 | 1439 | 120.39 | 28.95 | 1939 | 121.31 | 29.10 |
| 440 | 118.55 | 29.43 | 940 | 120.56 | 30.49 | 1440 | 120.38 | 28.95 | 1940 | 121.31 | 29.09 |
| 441 | 121.86 | 29.59 | 941 | 120.45 | 30.53 | 1441 | 120.01 | 28.94 | 1941 | 121.21 | 28.96 |
| 442 | 121.85 | 29.60 | 942 | 120.50 | 30.56 | 1442 | 120.02 | 28.92 | 1942 | 121.13 | 28.58 |
| 443 | 121.83 | 29.60 | 943 | 120.50 | 30.57 | 1443 | 120.04 | 28.96 | 1943 | 121.13 | 28.55 |
| 444 | 121.85 | 29.57 | 944 | 120.40 | 30.54 | 1444 | 120.04 | 28.97 | 1944 | 121.12 | 28.57 |
| 445 | 121.90 | 29.55 | 945 | 120.49 | 30.69 | 1445 | 120.05 | 28.80 | 1945 | 121.07 | 28.89 |
| 446 | 121.88 | 29.51 | 946 | 120.50 | 30.70 | 1446 | 120.10 | 28.79 | 1946 | 121.06 | 28.89 |
| 447 | 121.87 | 29.51 | 947 | 120.51 | 30.71 | 1447 | 120.12 | 28.82 | 1947 | 121.01 | 28.87 |
| 448 | 121.88 | 29.50 | 948 | 120.49 | 30.70 | 1448 | 120.12 | 28.83 | 1948 | 121.01 | 28.88 |
| 449 | 121.87 | 29.17 | 949 | 120.44 | 30.63 | 1449 | 120.23 | 29.01 | 1949 | 121.06 | 28.70 |
| 450 | 121.85 | 29.17 | 950 | 120.46 | 30.62 | 1450 | 120.23 | 29.00 | 1950 | 121.10 | 28.74 |
| 451 | 121.88 | 29.17 | 951 | 120.43 | 30.62 | 1451 | 120.25 | 29.02 | 1951 | 121.11 | 28.74 |
| 452 | 121.94 | 29.26 | 952 | 120.45 | 30.61 | 1452 | 120.24 | 29.01 | 1952 | 121.10 | 28.74 |
| 453 | 121.90 | 29.28 | 953 | 120.36 | 30.63 | 1453 | 120.10 | 28.96 | 1953 | 121.30 | 28.94 |
| 454 | 121.85 | 29.32 | 954 | 120.35 | 30.64 | 1454 | 120.12 | 28.90 | 1954 | 121.32 | 28.94 |
| 455 | 121.80 | 29.33 | 955 | 120.35 | 30.65 | 1455 | 120.11 | 28.97 | 1955 | 121.30 | 28.94 |
| 456 | 121.80 | 29.35 | 956 | 120.37 | 30.64 | 1456 | 120.12 | 28.93 | 1956 | 121.26 | 28.92 |
| 457 | 121.67 | 29.50 | 957 | 120.62 | 30.58 | 1457 | 120.12 | 29.03 | 1957 | 121.10 | 28.47 |
| 458 | 121.68 | 29.47 | 958 | 120.63 | 30.57 | 1458 | 120.12 | 29.02 | 1958 | 121.10 | 28.47 |
| 459 | 121.62 | 29.47 | 959 | 120.65 | 30.56 | 1459 | 120.13 | 29.05 | 1959 | 121.10 | 28.47 |
| 460 | 121.63 | 29.47 | 960 | 120.63 | 30.55 | 1460 | 120.12 | 29.02 | 1960 | 121.10 | 28.47 |
| 461 | 121.32 | 30.03 | 961 | 119.76 | 30.78 | 1461 | 118.66 | 28.94 | 1961 | 120.00 | 28.09 |
| 462 | 121.32 | 30.01 | 962 | 119.74 | 30.77 | 1462 | 118.67 | 28.95 | 1962 | 120.01 | 28.08 |
| 463 | 121.39 | 30.05 | 963 | 119.74 | 30.76 | 1463 | 118.70 | 28.95 | 1963 | 120.04 | 28.10 |
| 464 | 121.37 | 29.43 | 964 | 119.77 | 30.74 | 1464 | 118.66 | 28.93 | 1964 | 120.03 | 28.08 |
| 465 | 121.57 | 30.07 | 965 | 119.61 | 30.57 | 1465 | 118.65 | 29.09 | 1965 | 120.26 | 28.05 |
| 466 | 121.16 | 29.12 | 966 | 119.60 | 30.57 | 1466 | 118.66 | 29.09 | 1966 | 120.23 | 28.07 |
| 467 | 121.13 | 29.17 | 967 | 119.58 | 30.55 | 1467 | 118.63 | 29.08 | 1967 | 120.27 | 28.06 |
| 468 | 121.14 | 28.95 | 968 | 119.57 | 30.53 | 1468 | 118.63 | 29.07 | 1968 | 120.27 | 28.07 |
| 469 | 121.02 | 30.09 | 969 | 119.61 | 30.76 | 1469 | 118.38 | 28.86 | 1969 | 120.23 | 28.34 |
| 470 | 121.01 | 30.07 | 970 | 119.58 | 30.78 | 1470 | 118.41 | 28.86 | 1970 | 120.22 | 28.36 |
| 471 | 120.96 | 30.13 | 971 | 119.60 | 30.78 | 1471 | 118.42 | 28.88 | 1971 | 120.23 | 28.33 |

---

|     |        |       |      |        |       |      |        |       |      |        |       |
|-----|--------|-------|------|--------|-------|------|--------|-------|------|--------|-------|
| 472 | 121.00 | 30.08 | 972  | 119.66 | 30.77 | 1472 | 118.44 | 28.88 | 1972 | 120.23 | 28.35 |
| 473 | 121.06 | 30.20 | 973  | 119.63 | 30.52 | 1473 | 118.44 | 28.90 | 1973 | 120.20 | 28.09 |
| 474 | 121.05 | 30.23 | 974  | 119.63 | 30.53 | 1474 | 118.45 | 28.91 | 1974 | 120.19 | 28.08 |
| 475 | 121.08 | 30.24 | 975  | 119.65 | 30.54 | 1475 | 118.45 | 28.91 | 1975 | 120.19 | 28.08 |
| 476 | 121.08 | 30.35 | 976  | 119.65 | 30.55 | 1476 | 118.43 | 28.92 | 1976 | 120.19 | 28.07 |
| 477 | 121.17 | 30.14 | 977  | 119.57 | 30.67 | 1477 | 118.67 | 28.64 | 1977 | 120.14 | 28.27 |
| 478 | 121.19 | 30.15 | 978  | 119.57 | 30.65 | 1478 | 118.68 | 28.64 | 1978 | 120.11 | 28.27 |
| 479 | 121.18 | 30.16 | 979  | 119.56 | 30.68 | 1479 | 118.65 | 28.61 | 1979 | 120.10 | 28.23 |
| 480 | 121.20 | 30.15 | 980  | 119.52 | 30.70 | 1480 | 118.68 | 28.63 | 1980 | 120.12 | 28.24 |
| 481 | 120.68 | 28.07 | 981  | 120.31 | 29.40 | 1481 | 119.02 | 29.11 | 1981 | 119.50 | 28.06 |
| 482 | 120.70 | 28.11 | 982  | 120.31 | 29.41 | 1482 | 119.19 | 29.12 | 1982 | 119.49 | 28.05 |
| 483 | 120.70 | 28.08 | 983  | 120.32 | 29.42 | 1483 | 119.21 | 29.14 | 1983 | 119.50 | 28.05 |
| 484 | 120.69 | 28.07 | 984  | 120.33 | 29.43 | 1484 | 119.21 | 29.16 | 1984 | 119.51 | 28.08 |
| 485 | 120.75 | 28.20 | 985  | 120.16 | 29.83 | 1485 | 119.29 | 29.11 | 1985 | 119.67 | 28.22 |
| 486 | 120.75 | 28.18 | 986  | 120.14 | 29.81 | 1486 | 119.16 | 29.12 | 1986 | 119.67 | 28.21 |
| 487 | 120.75 | 28.21 | 987  | 120.13 | 29.78 | 1487 | 119.15 | 29.12 | 1987 | 119.78 | 28.26 |
| 488 | 120.78 | 28.23 | 988  | 120.12 | 29.81 | 1488 | 119.10 | 29.11 | 1988 | 119.67 | 28.25 |
| 489 | 120.70 | 28.48 | 989  | 120.27 | 29.82 | 1489 | 119.31 | 29.07 | 1989 | 119.57 | 28.18 |
| 490 | 120.72 | 28.46 | 990  | 120.26 | 29.83 | 1490 | 119.26 | 29.21 | 1990 | 119.55 | 28.25 |
| 491 | 120.72 | 28.47 | 991  | 120.24 | 29.81 | 1491 | 119.22 | 29.06 | 1991 | 119.52 | 28.20 |
| 492 | 120.72 | 28.45 | 992  | 120.23 | 29.81 | 1492 | 119.21 | 29.06 | 1992 | 119.54 | 28.20 |
| 493 | 120.76 | 28.32 | 993  | 120.16 | 29.53 | 1493 | 119.13 | 29.91 | 1993 | 119.65 | 28.20 |
| 494 | 120.75 | 28.32 | 994  | 120.14 | 29.57 | 1494 | 119.19 | 29.86 | 1994 | 119.45 | 28.13 |
| 495 | 120.77 | 28.31 | 995  | 120.11 | 29.55 | 1495 | 119.17 | 29.87 | 1995 | 119.42 | 28.10 |
| 496 | 120.79 | 28.32 | 996  | 120.09 | 29.51 | 1496 | 119.17 | 28.85 | 1996 | 119.45 | 28.13 |
| 497 | 120.56 | 28.30 | 997  | 120.24 | 29.71 | 1497 | 119.17 | 29.09 | 1997 | 119.59 | 28.05 |
| 498 | 120.56 | 28.31 | 998  | 120.24 | 29.71 | 1498 | 119.19 | 29.07 | 1998 | 119.59 | 28.06 |
| 499 | 120.56 | 28.32 | 999  | 120.13 | 29.71 | 1499 | 119.15 | 29.07 | 1999 | 119.57 | 28.06 |
| 500 | 120.40 | 28.31 | 1000 | 120.17 | 29.72 | 1500 | 119.17 | 29.06 |      |        |       |

---

## References

1. UAEPA. Exposure Factors Handbook (Final Report); US Environmental Protection Agency, Washington: Washington, DC, USA., 2011.
2. MEPC. Technical guidelines for risk assessment of contaminated sites, HJ 25.3-2014; Ministry of Environmental Protection of the People's Republic of China: 2014.
3. XL., D. Exposure factors handbook of Chinese population: adults; China Environmental Science Press: Beijing, 2016.
4. XL., D. Exposure factors handbook of Chinese population: children; China Environmental Science Press: Beijing, 2016.
5. Obiri-Nyarko, F.; Duah, A.A.; Karikari, A.Y.; Agyekum, W.A.; Manu, E.; Tagoe, R. Assessment of heavy metal contamination in soils at the Kpone landfill site, Ghana: Implication for ecological and health risk assessment. *Chemosphere* 2021, 282, 131007, doi:10.1016/j.chemosphere.2021.131007.
6. USEPA. Supplemental Guidance for Developing Soil Screening Levels for Superfund Sites; US Environmental Protection Agency: Washington, DC, USA., 2002.
7. USEPA. Supplemental Guidance for Developing Soil Screening Levels for Superfund Sites [R]. Office of Solid Waste and Emergency Response, Washington, DC 2001, [OSWER9355.4-24].
8. Cheng, Z.; Chen, L.J.; Li, H.H.; Lin, J.Q.; Yang, Z.B.; Yang, Y.X.; Xu, X.X.; Xian, J.R.; Shao, J.R.; Zhu, X.M. Characteristics and health risk assessment of heavy metals exposure via household dust from urban area in Chengdu, China. *Sci Total Environ* 2018, 619-620, 621-629, doi:10.1016/j.scitotenv.2017.11.144.
9. Jiang, Y.; Chao, S.; Liu, J.; Yang, Y.; Chen, Y.; Zhang, A.; Cao, H. Source apportionment and health risk assessment of heavy metals in soil for a township in Jiangsu Province, China. *Chemosphere* 2017, 168, 1658-1668, doi:10.1016/j.chemosphere.2016.11.088.
10. Cao, S.; Duan, X.; Zhao, X.; Wang, B.; Ma, J.; Fan, D.; Sun, C.; He, B.; Wei, F.; Jiang, G. Health risk assessment of various metal(loid)s via multiple exposure pathways on children living near a typical lead-acid battery plant, China. *Environ Pollut* 2015, 200, 16-23, doi:10.1016/j.envpol.2015.02.010.
